# Supplementary material for: Exploring causal relationships between inflammatory cytokines and allergic rhinitis, chronic rhinosinusitis, and nasal polyps: a Mendelian randomization study
Source: Front Immunol. 2023 Nov 10;14:1288517. doi: 10.3389/fimmu.2023.1288517 (PMC10667686; doi:10.3389/fimmu.2023.1288517)
Supplement: Supplementary file 1 [file Table_1.xlsx]

## Sheet: S1
MR analysis of Inflammatory Cytokines on AR
outcome	exposure	method	nsnp	b	se	pval	lo_ci	up_ci	or	or_lci95	or_uci95
Doctor diagnosed hayfever or allergic rhinitis || id:ukb-b-7178	B_NGF	MR Egger	4	-0.0324854	0.0457992	0.551677	-0.122252	0.057281	0.968037	0.884925	1.05895
Doctor diagnosed hayfever or allergic rhinitis || id:ukb-b-7178	B_NGF	Weighted median	4	-0.0101276	0.00951324	0.287067	-0.0287735	0.00851836	0.989924	0.971636	1.00855
Doctor diagnosed hayfever or allergic rhinitis || id:ukb-b-7178	B_NGF	Inverse variance weighted	4	-0.00349605	0.00724948	0.62963	-0.017705	0.0107129	0.99651	0.982451	1.01077
Doctor diagnosed hayfever or allergic rhinitis || id:ukb-b-7178	CTACK	MR Egger	11	0.00340064	0.00659981	0.618785	-0.00953499	0.0163363	1.00341	0.99051	1.01647
Doctor diagnosed hayfever or allergic rhinitis || id:ukb-b-7178	CTACK	Weighted median	11	0.00229778	0.00478359	0.630982	-0.00707806	0.0116736	1.0023	0.992947	1.01174
Doctor diagnosed hayfever or allergic rhinitis || id:ukb-b-7178	CTACK	Inverse variance weighted	11	-0.000222889	0.00364355	0.951221	-0.00736424	0.00691846	0.999777	0.992663	1.00694
Doctor diagnosed hayfever or allergic rhinitis || id:ukb-b-7178	EOTAXIN	MR Egger	15	-0.00963637	0.0189919	0.620376	-0.0468604	0.0275877	0.99041	0.954221	1.02797
Doctor diagnosed hayfever or allergic rhinitis || id:ukb-b-7178	EOTAXIN	Weighted median	15	-0.00559056	0.00739762	0.449814	-0.0200899	0.00890878	0.994425	0.980111	1.00895
Doctor diagnosed hayfever or allergic rhinitis || id:ukb-b-7178	EOTAXIN	Inverse variance weighted	15	0.00367113	0.00797493	0.645276	-0.0119597	0.019302	1.00368	0.988112	1.01949
Doctor diagnosed hayfever or allergic rhinitis || id:ukb-b-7178	FGF_BASIC	MR Egger	6	0.0323839	0.0195415	0.172822	-0.00591744	0.0706853	1.03291	0.9941	1.07324
Doctor diagnosed hayfever or allergic rhinitis || id:ukb-b-7178	FGF_BASIC	Weighted median	6	0.0122232	0.0103811	0.239016	-0.00812375	0.0325702	1.0123	0.991909	1.03311
Doctor diagnosed hayfever or allergic rhinitis || id:ukb-b-7178	FGF_BASIC	Inverse variance weighted	6	0.0064182	0.0121271	0.596635	-0.0173509	0.0301873	1.00644	0.982799	1.03065
Doctor diagnosed hayfever or allergic rhinitis || id:ukb-b-7178	G_CSF	MR Egger	9	0.0151821	0.00996203	0.171333	-0.00434349	0.0347077	1.0153	0.995666	1.03532
Doctor diagnosed hayfever or allergic rhinitis || id:ukb-b-7178	G_CSF	Weighted median	9	0.00819007	0.00713678	0.25114	-0.00579803	0.0221782	1.00822	0.994219	1.02243
Doctor diagnosed hayfever or allergic rhinitis || id:ukb-b-7178	G_CSF	Inverse variance weighted	9	0.00662921	0.00729403	0.363427	-0.00766708	0.0209255	1.00665	0.992362	1.02115
Doctor diagnosed hayfever or allergic rhinitis || id:ukb-b-7178	GROA	MR Egger	8	-0.00232961	0.00688146	0.746493	-0.0158173	0.0111581	0.997673	0.984307	1.01122
Doctor diagnosed hayfever or allergic rhinitis || id:ukb-b-7178	GROA	Weighted median	8	-0.00147074	0.00397186	0.711166	-0.00925558	0.0063141	0.99853	0.990787	1.00633
Doctor diagnosed hayfever or allergic rhinitis || id:ukb-b-7178	GROA	Inverse variance weighted	8	-0.00201448	0.00284929	0.47956	-0.0075991	0.00357014	0.997988	0.99243	1.00358
Doctor diagnosed hayfever or allergic rhinitis || id:ukb-b-7178	HGF	MR Egger	8	0.00844715	0.0139884	0.568045	-0.0189702	0.0358645	1.00848	0.981209	1.03652
Doctor diagnosed hayfever or allergic rhinitis || id:ukb-b-7178	HGF	Weighted median	8	0.00330447	0.00831294	0.690992	-0.0129889	0.0195978	1.00331	0.987095	1.01979
Doctor diagnosed hayfever or allergic rhinitis || id:ukb-b-7178	HGF	Inverse variance weighted	8	0.00491447	0.00644094	0.445461	-0.00770977	0.0175387	1.00493	0.99232	1.01769
Doctor diagnosed hayfever or allergic rhinitis || id:ukb-b-7178	IFN_G	MR Egger	11	0.000568431	0.0116709	0.962218	-0.0223064	0.0234433	1.00057	0.977941	1.02372
Doctor diagnosed hayfever or allergic rhinitis || id:ukb-b-7178	IFN_G	Weighted median	11	0.00245356	0.00791512	0.756574	-0.0130601	0.0179672	1.00246	0.987025	1.01813
Doctor diagnosed hayfever or allergic rhinitis || id:ukb-b-7178	IFN_G	Inverse variance weighted	11	0.0077766	0.006138	0.205169	-0.00425387	0.0198071	1.00781	0.995755	1.02
Doctor diagnosed hayfever or allergic rhinitis || id:ukb-b-7178	IL_10	MR Egger	15	0.000723796	0.00946823	0.940229	-0.0178339	0.0192815	1.00072	0.982324	1.01947
Doctor diagnosed hayfever or allergic rhinitis || id:ukb-b-7178	IL_10	Weighted median	15	0.00102282	0.00553762	0.853462	-0.00983092	0.0118766	1.00102	0.990217	1.01195
Doctor diagnosed hayfever or allergic rhinitis || id:ukb-b-7178	IL_10	Inverse variance weighted	15	-0.000594222	0.00427981	0.889574	-0.00898265	0.0077942	0.999406	0.991058	1.00782
Doctor diagnosed hayfever or allergic rhinitis || id:ukb-b-7178	IL_12_P70	MR Egger	13	0.00220038	0.00652007	0.742109	-0.010579	0.0149797	1.0022	0.989477	1.01509
Doctor diagnosed hayfever or allergic rhinitis || id:ukb-b-7178	IL_12_P70	Weighted median	13	0.00118796	0.00438051	0.786244	-0.00739785	0.00977376	1.00119	0.992629	1.00982
Doctor diagnosed hayfever or allergic rhinitis || id:ukb-b-7178	IL_12_P70	Inverse variance weighted	13	-0.000194809	0.00377111	0.958801	-0.00758618	0.00719657	0.999805	0.992443	1.00722
Doctor diagnosed hayfever or allergic rhinitis || id:ukb-b-7178	IL_13	MR Egger	11	0.000118716	0.00634889	0.985489	-0.0123251	0.0125625	1.00012	0.987751	1.01264
Doctor diagnosed hayfever or allergic rhinitis || id:ukb-b-7178	IL_13	Weighted median	11	-0.000890831	0.00397387	0.822623	-0.00867961	0.00689795	0.99911	0.991358	1.00692
Doctor diagnosed hayfever or allergic rhinitis || id:ukb-b-7178	IL_13	Inverse variance weighted	11	-0.000125932	0.00345674	0.970939	-0.00690114	0.00664927	0.999874	0.993123	1.00667
Doctor diagnosed hayfever or allergic rhinitis || id:ukb-b-7178	IL_16	MR Egger	7	0.00205113	0.00485748	0.690376	-0.00746953	0.0115718	1.00205	0.992558	1.01164
Doctor diagnosed hayfever or allergic rhinitis || id:ukb-b-7178	IL_16	Weighted median	7	0.000595704	0.00368558	0.871596	-0.00662803	0.00781944	1.0006	0.993394	1.00785
Doctor diagnosed hayfever or allergic rhinitis || id:ukb-b-7178	IL_16	Inverse variance weighted	7	5.8e-05	0.00314188	0.985259	-0.00610003	0.00621612	1.00006	0.993919	1.00624
Doctor diagnosed hayfever or allergic rhinitis || id:ukb-b-7178	IL_17	MR Egger	8	-0.00293371	0.0168105	0.8672	-0.0358824	0.0300149	0.997071	0.964754	1.03047
Doctor diagnosed hayfever or allergic rhinitis || id:ukb-b-7178	IL_17	Weighted median	8	-0.000842856	0.00898563	0.925268	-0.0184547	0.016769	0.999157	0.981715	1.01691
Doctor diagnosed hayfever or allergic rhinitis || id:ukb-b-7178	IL_17	Inverse variance weighted	8	0.00163934	0.00806294	0.838886	-0.014164	0.0174427	1.00164	0.985936	1.0176
Doctor diagnosed hayfever or allergic rhinitis || id:ukb-b-7178	IL_18	MR Egger	10	0.0126589	0.00667276	0.0943877	-0.000419681	0.0257376	1.01274	0.99958	1.02607
Doctor diagnosed hayfever or allergic rhinitis || id:ukb-b-7178	IL_18	Weighted median	10	0.00816678	0.0042504	0.0546793	-0.000163999	0.0164976	1.0082	0.999836	1.01663
Doctor diagnosed hayfever or allergic rhinitis || id:ukb-b-7178	IL_18	Inverse variance weighted	10	0.00565104	0.00323467	0.0806339	-0.000688921	0.011991	1.00567	0.999311	1.01206
Doctor diagnosed hayfever or allergic rhinitis || id:ukb-b-7178	IL_1B	MR Egger	4	0.00598103	0.0266555	0.843297	-0.0462637	0.0582257	1.006	0.95479	1.05995
Doctor diagnosed hayfever or allergic rhinitis || id:ukb-b-7178	IL_1B	Weighted median	4	-0.00478997	0.00883339	0.587642	-0.0221034	0.0125235	0.995221	0.978139	1.0126
Doctor diagnosed hayfever or allergic rhinitis || id:ukb-b-7178	IL_1B	Inverse variance weighted	4	-0.00110652	0.00801562	0.890204	-0.0168171	0.0146041	0.998894	0.983323	1.01471
Doctor diagnosed hayfever or allergic rhinitis || id:ukb-b-7178	IL_1RA	MR Egger	6	0.019432	0.0179997	0.341083	-0.0158475	0.0547115	1.01962	0.984277	1.05624
Doctor diagnosed hayfever or allergic rhinitis || id:ukb-b-7178	IL_1RA	Weighted median	6	0.0056066	0.00833881	0.501361	-0.0107375	0.0219507	1.00562	0.98932	1.02219
Doctor diagnosed hayfever or allergic rhinitis || id:ukb-b-7178	IL_1RA	Inverse variance weighted	6	0.00732908	0.00651968	0.260951	-0.00544949	0.0201077	1.00736	0.994565	1.02031
Doctor diagnosed hayfever or allergic rhinitis || id:ukb-b-7178	IL_2	MR Egger	8	0.00638675	0.00880887	0.495721	-0.0108786	0.0236521	1.00641	0.98918	1.02393
Doctor diagnosed hayfever or allergic rhinitis || id:ukb-b-7178	IL_2	Weighted median	8	0.00428933	0.00651996	0.510617	-0.00848979	0.0170685	1.0043	0.991546	1.01721
Doctor diagnosed hayfever or allergic rhinitis || id:ukb-b-7178	IL_2	Inverse variance weighted	8	0.0016546	0.00464901	0.721912	-0.00745745	0.0107667	1.00166	0.99257	1.01082
Doctor diagnosed hayfever or allergic rhinitis || id:ukb-b-7178	IL_2RA	MR Egger	5	0.00704329	0.00662878	0.365945	-0.00594912	0.0200357	1.00707	0.994069	1.02024
Doctor diagnosed hayfever or allergic rhinitis || id:ukb-b-7178	IL_2RA	Weighted median	5	0.000896061	0.00466928	0.847816	-0.00825573	0.0100479	1.0009	0.991778	1.0101
Doctor diagnosed hayfever or allergic rhinitis || id:ukb-b-7178	IL_2RA	Inverse variance weighted	5	-0.000670864	0.00428456	0.875578	-0.00906861	0.00772688	0.999329	0.990972	1.00776
Doctor diagnosed hayfever or allergic rhinitis || id:ukb-b-7178	IL_4	MR Egger	12	-0.0218841	0.0100164	0.0538053	-0.0415163	-0.00225188	0.978354	0.959334	0.997751
Doctor diagnosed hayfever or allergic rhinitis || id:ukb-b-7178	IL_4	Weighted median	12	-0.0111775	0.00790414	0.157323	-0.0266696	0.00431461	0.988885	0.973683	1.00432
Doctor diagnosed hayfever or allergic rhinitis || id:ukb-b-7178	IL_4	Inverse variance weighted	12	-0.00730691	0.00624608	0.242066	-0.0195492	0.00493541	0.99272	0.980641	1.00495
Doctor diagnosed hayfever or allergic rhinitis || id:ukb-b-7178	IL_5	MR Egger	7	-0.0149803	0.0139181	0.330955	-0.0422599	0.0122992	0.985131	0.958621	1.01238
Doctor diagnosed hayfever or allergic rhinitis || id:ukb-b-7178	IL_5	Weighted median	7	0.00339324	0.00735964	0.644755	-0.0110317	0.0178181	1.0034	0.989029	1.01798
Doctor diagnosed hayfever or allergic rhinitis || id:ukb-b-7178	IL_5	Inverse variance weighted	7	0.00131768	0.00556481	0.812822	-0.00958936	0.0122247	1.00132	0.990456	1.0123
Doctor diagnosed hayfever or allergic rhinitis || id:ukb-b-7178	IL_6	MR Egger	11	0.00352318	0.0115581	0.767432	-0.0191307	0.026177	1.00353	0.981051	1.02652
Doctor diagnosed hayfever or allergic rhinitis || id:ukb-b-7178	IL_6	Weighted median	11	-0.00250211	0.00811862	0.757935	-0.0184146	0.0134104	0.997501	0.981754	1.0135
Doctor diagnosed hayfever or allergic rhinitis || id:ukb-b-7178	IL_6	Inverse variance weighted	11	0.000786708	0.00598742	0.895464	-0.0109486	0.0125221	1.00079	0.989111	1.0126
Doctor diagnosed hayfever or allergic rhinitis || id:ukb-b-7178	IL_7	MR Egger	10	0.00248487	0.00849981	0.777462	-0.0141748	0.0191445	1.00249	0.985925	1.01933
Doctor diagnosed hayfever or allergic rhinitis || id:ukb-b-7178	IL_7	Weighted median	10	0.00132135	0.00446581	0.767321	-0.00743163	0.0100743	1.00132	0.992596	1.01013
Doctor diagnosed hayfever or allergic rhinitis || id:ukb-b-7178	IL_7	Inverse variance weighted	10	0.00036884	0.00378152	0.9223	-0.00704295	0.00778063	1.00037	0.992982	1.00781
Doctor diagnosed hayfever or allergic rhinitis || id:ukb-b-7178	IL_8	MR Egger	7	0.0155726	0.00735182	0.087705	0.00116309	0.0299822	1.01569	1.00116	1.03044
Doctor diagnosed hayfever or allergic rhinitis || id:ukb-b-7178	IL_8	Weighted median	7	0.00717661	0.00577715	0.214148	-0.0041466	0.0184998	1.0072	0.995862	1.01867
Doctor diagnosed hayfever or allergic rhinitis || id:ukb-b-7178	IL_8	Inverse variance weighted	7	0.00243037	0.00538962	0.652036	-0.00813328	0.012994	1.00243	0.9919	1.01308
Doctor diagnosed hayfever or allergic rhinitis || id:ukb-b-7178	IL_9	MR Egger	5	0.0196934	0.0139078	0.251745	-0.00756596	0.0469527	1.01989	0.992463	1.04807
Doctor diagnosed hayfever or allergic rhinitis || id:ukb-b-7178	IL_9	Weighted median	5	0.00210968	0.00718522	0.769053	-0.0119734	0.0161927	1.00211	0.988098	1.01632
Doctor diagnosed hayfever or allergic rhinitis || id:ukb-b-7178	IL_9	Inverse variance weighted	5	-0.000149691	0.00575865	0.979262	-0.0114366	0.0111373	0.99985	0.988629	1.0112
Doctor diagnosed hayfever or allergic rhinitis || id:ukb-b-7178	IP_10	MR Egger	9	0.0176127	0.0155217	0.293851	-0.0128098	0.0480351	1.01777	0.987272	1.04921
Doctor diagnosed hayfever or allergic rhinitis || id:ukb-b-7178	IP_10	Weighted median	9	-0.000717063	0.00676063	0.915531	-0.0139679	0.0125338	0.999283	0.986129	1.01261
Doctor diagnosed hayfever or allergic rhinitis || id:ukb-b-7178	IP_10	Inverse variance weighted	9	-0.00160641	0.00615536	0.794109	-0.0136709	0.0104581	0.998395	0.986422	1.01051
Doctor diagnosed hayfever or allergic rhinitis || id:ukb-b-7178	M_CSF	MR Egger	10	-0.0069893	0.00796021	0.405525	-0.0225913	0.00861272	0.993035	0.977662	1.00865
Doctor diagnosed hayfever or allergic rhinitis || id:ukb-b-7178	M_CSF	Weighted median	10	0.00191024	0.00454517	0.674281	-0.00699829	0.0108188	1.00191	0.993026	1.01088
Doctor diagnosed hayfever or allergic rhinitis || id:ukb-b-7178	M_CSF	Inverse variance weighted	10	-0.00277662	0.00363663	0.445157	-0.00990441	0.00435118	0.997227	0.990144	1.00436
Doctor diagnosed hayfever or allergic rhinitis || id:ukb-b-7178	MCP_1_MCAF	MR Egger	10	0.00123344	0.0133051	0.928418	-0.0248446	0.0273115	1.00123	0.975461	1.02769
Doctor diagnosed hayfever or allergic rhinitis || id:ukb-b-7178	MCP_1_MCAF	Weighted median	10	-0.00676953	0.00715259	0.343922	-0.0207886	0.00724954	0.993253	0.979426	1.00728
Doctor diagnosed hayfever or allergic rhinitis || id:ukb-b-7178	MCP_1_MCAF	Inverse variance weighted	10	-0.00220183	0.00505433	0.663104	-0.0121083	0.00770465	0.997801	0.987965	1.00773
Doctor diagnosed hayfever or allergic rhinitis || id:ukb-b-7178	MCP_3	MR Egger	6	-0.0112198	0.00899853	0.280478	-0.0288569	0.00641732	0.988843	0.971555	1.00644
Doctor diagnosed hayfever or allergic rhinitis || id:ukb-b-7178	MCP_3	Weighted median	6	0.00189163	0.00465953	0.684764	-0.00724105	0.0110243	1.00189	0.992785	1.01109
Doctor diagnosed hayfever or allergic rhinitis || id:ukb-b-7178	MCP_3	Inverse variance weighted	6	-0.00230013	0.00354775	0.516768	-0.00925373	0.00465346	0.997703	0.990789	1.00466
Doctor diagnosed hayfever or allergic rhinitis || id:ukb-b-7178	MIF	MR Egger	7	-0.0187729	0.018179	0.349099	-0.0544038	0.016858	0.981402	0.94705	1.017
Doctor diagnosed hayfever or allergic rhinitis || id:ukb-b-7178	MIF	Weighted median	7	0.0034206	0.00716097	0.632883	-0.0106149	0.0174561	1.00343	0.989441	1.01761
Doctor diagnosed hayfever or allergic rhinitis || id:ukb-b-7178	MIF	Inverse variance weighted	7	0.000657601	0.00555091	0.905698	-0.0102222	0.0115374	1.00066	0.98983	1.0116
Doctor diagnosed hayfever or allergic rhinitis || id:ukb-b-7178	MIG	MR Egger	8	0.012783	0.00945473	0.225106	-0.00574829	0.0313143	1.01287	0.994268	1.03181
Doctor diagnosed hayfever or allergic rhinitis || id:ukb-b-7178	MIG	Weighted median	8	0.00806995	0.00598424	0.177487	-0.00365915	0.0197991	1.0081	0.996348	1.02
Doctor diagnosed hayfever or allergic rhinitis || id:ukb-b-7178	MIG	Inverse variance weighted	8	0.00711268	0.00465496	0.126517	-0.00201103	0.0162364	1.00714	0.997991	1.01637
Doctor diagnosed hayfever or allergic rhinitis || id:ukb-b-7178	MIP_1A	MR Egger	4	0.0080531	0.0291134	0.808043	-0.0490091	0.0651153	1.00809	0.952172	1.06728
Doctor diagnosed hayfever or allergic rhinitis || id:ukb-b-7178	MIP_1A	Weighted median	4	0.0218286	0.00940605	0.020303	0.00339277	0.0402645	1.02207	1.0034	1.04109
Doctor diagnosed hayfever or allergic rhinitis || id:ukb-b-7178	MIP_1A	Inverse variance weighted	4	0.0178194	0.00798825	0.025701	0.00216242	0.0334764	1.01798	1.00216	1.03404
Doctor diagnosed hayfever or allergic rhinitis || id:ukb-b-7178	MIP_1B	MR Egger	18	0.00366261	0.00466216	0.443579	-0.00547523	0.0128004	1.00367	0.99454	1.01288
Doctor diagnosed hayfever or allergic rhinitis || id:ukb-b-7178	MIP_1B	Weighted median	18	0.0029251	0.00370227	0.42948	-0.00433135	0.0101816	1.00293	0.995678	1.01023
Doctor diagnosed hayfever or allergic rhinitis || id:ukb-b-7178	MIP_1B	Inverse variance weighted	18	0.00266818	0.00276326	0.334249	-0.00274781	0.00808417	1.00267	0.997256	1.00812
Doctor diagnosed hayfever or allergic rhinitis || id:ukb-b-7178	PDGF_BB	MR Egger	13	0.00405159	0.00811388	0.627376	-0.0118516	0.0199548	1.00406	0.988218	1.02016
Doctor diagnosed hayfever or allergic rhinitis || id:ukb-b-7178	PDGF_BB	Weighted median	13	-0.00572773	0.00586105	0.328444	-0.0172154	0.00575994	0.994289	0.982932	1.00578
Doctor diagnosed hayfever or allergic rhinitis || id:ukb-b-7178	PDGF_BB	Inverse variance weighted	13	-0.00523928	0.00441986	0.235861	-0.0139022	0.00342365	0.994774	0.986194	1.00343
Doctor diagnosed hayfever or allergic rhinitis || id:ukb-b-7178	RANTES	MR Egger	10	-0.0216036	0.0151514	0.191744	-0.0513004	0.00809322	0.978628	0.949993	1.00813
Doctor diagnosed hayfever or allergic rhinitis || id:ukb-b-7178	RANTES	Weighted median	10	0.00365769	0.00683137	0.592356	-0.0097318	0.0170472	1.00366	0.990315	1.01719
Doctor diagnosed hayfever or allergic rhinitis || id:ukb-b-7178	RANTES	Inverse variance weighted	10	-0.000484808	0.00644483	0.940036	-0.0131167	0.0121471	0.999515	0.986969	1.01222
Doctor diagnosed hayfever or allergic rhinitis || id:ukb-b-7178	SCF	MR Egger	10	0.0176552	0.0235704	0.475278	-0.0285427	0.063853	1.01781	0.971861	1.06594
Doctor diagnosed hayfever or allergic rhinitis || id:ukb-b-7178	SCF	Weighted median	10	-0.00345101	0.00868799	0.691208	-0.0204795	0.0135774	0.996555	0.979729	1.01367
Doctor diagnosed hayfever or allergic rhinitis || id:ukb-b-7178	SCF	Inverse variance weighted	10	-0.00817578	0.00872927	0.348968	-0.0252852	0.0089336	0.991858	0.975032	1.00897
Doctor diagnosed hayfever or allergic rhinitis || id:ukb-b-7178	SCGF_B	MR Egger	17	-0.00325921	0.00574621	0.578974	-0.0145218	0.00800337	0.996746	0.985583	1.00804
Doctor diagnosed hayfever or allergic rhinitis || id:ukb-b-7178	SCGF_B	Weighted median	17	-0.00312432	0.00424443	0.461671	-0.0114434	0.00519476	0.996881	0.988622	1.00521
Doctor diagnosed hayfever or allergic rhinitis || id:ukb-b-7178	SCGF_B	Inverse variance weighted	17	-0.00146357	0.00308162	0.634832	-0.00750355	0.0045764	0.998537	0.992525	1.00459
Doctor diagnosed hayfever or allergic rhinitis || id:ukb-b-7178	SDF_1A	MR Egger	6	0.00334657	0.0113876	0.783468	-0.0189731	0.0256662	1.00335	0.981206	1.026
Doctor diagnosed hayfever or allergic rhinitis || id:ukb-b-7178	SDF_1A	Weighted median	6	-0.00361987	0.00897992	0.68687	-0.0212205	0.0139808	0.996387	0.979003	1.01408
Doctor diagnosed hayfever or allergic rhinitis || id:ukb-b-7178	SDF_1A	Inverse variance weighted	6	-0.00287086	0.00702724	0.682882	-0.0166443	0.0109025	0.997133	0.983493	1.01096
Doctor diagnosed hayfever or allergic rhinitis || id:ukb-b-7178	TNF_A	MR Egger	4	0.0236061	0.0136997	0.227011	-0.00324541	0.0504576	1.02389	0.99676	1.05175
Doctor diagnosed hayfever or allergic rhinitis || id:ukb-b-7178	TNF_A	Weighted median	4	0.0160572	0.00787243	0.0413828	0.000627226	0.0314871	1.01619	1.00063	1.03199
Doctor diagnosed hayfever or allergic rhinitis || id:ukb-b-7178	TNF_A	Inverse variance weighted	4	0.0146671	0.00633829	0.0206649	0.00224408	0.0270902	1.01478	1.00225	1.02746
Doctor diagnosed hayfever or allergic rhinitis || id:ukb-b-7178	TNF_B	MR Egger	5	-0.000318545	0.00451034	0.94814	-0.00915882	0.00852173	0.999682	0.990883	1.00856
Doctor diagnosed hayfever or allergic rhinitis || id:ukb-b-7178	TNF_B	Weighted median	5	0.000364086	0.00323613	0.910422	-0.00597874	0.00670691	1.00036	0.994039	1.00673
Doctor diagnosed hayfever or allergic rhinitis || id:ukb-b-7178	TNF_B	Inverse variance weighted	5	1.97e-05	0.00302795	0.99482	-0.00591512	0.00595443	1.00002	0.994102	1.00597
Doctor diagnosed hayfever or allergic rhinitis || id:ukb-b-7178	TRAIL	MR Egger	13	-0.00363795	0.00419138	0.403955	-0.011853	0.00457715	0.996369	0.988217	1.00459
Doctor diagnosed hayfever or allergic rhinitis || id:ukb-b-7178	TRAIL	Weighted median	13	-0.00801646	0.00378762	0.034303	-0.0154402	-0.00059273	0.992016	0.984678	0.999407
Doctor diagnosed hayfever or allergic rhinitis || id:ukb-b-7178	TRAIL	Inverse variance weighted	13	-0.00617854	0.00330736	0.0617457	-0.012661	0.000303889	0.993841	0.987419	1.0003
Doctor diagnosed hayfever or allergic rhinitis || id:ukb-b-7178	VEGF	MR Egger	14	0.00157304	0.00457808	0.73709	-0.00739999	0.0105461	1.00157	0.992627	1.0106
Doctor diagnosed hayfever or allergic rhinitis || id:ukb-b-7178	VEGF	Weighted median	14	0.00100234	0.00331806	0.762588	-0.00550107	0.00750574	1.001	0.994514	1.00753
Doctor diagnosed hayfever or allergic rhinitis || id:ukb-b-7178	VEGF	Inverse variance weighted	14	0.000599414	0.00279453	0.83016	-0.00487786	0.00607669	1.0006	0.995134	1.0061

## Sheet: S2
MR analysis of Inflammatory Cytokines on NP
outcome	exposure	method	nsnp	b	se	pval	lo_ci	up_ci	or	or_lci95	or_uci95
Diagnoses - main ICD10: J33 Nasal polyp || id:ukb-a-541	B_NGF	MR Egger	4	0.00502616	0.00405828	0.341177	-0.00292808	0.0129804	1.00504	0.997076	1.01306
Diagnoses - main ICD10: J33 Nasal polyp || id:ukb-a-541	B_NGF	Weighted median	4	0.000975663	0.000903481	0.28019	-0.00079516	0.00274649	1.00098	0.999205	1.00275
Diagnoses - main ICD10: J33 Nasal polyp || id:ukb-a-541	B_NGF	Inverse variance weighted	4	0.000586969	0.000695016	0.398368	-0.000775263	0.0019492	1.00059	0.999225	1.00195
Diagnoses - main ICD10: J33 Nasal polyp || id:ukb-a-541	CTACK	MR Egger	13	-0.000721226	0.000557563	0.22233	-0.00181405	0.000371597	0.999279	0.998188	1.00037
Diagnoses - main ICD10: J33 Nasal polyp || id:ukb-a-541	CTACK	Weighted median	13	-0.000480023	0.000438668	0.273835	-0.00133981	0.000379766	0.99952	0.998661	1.00038
Diagnoses - main ICD10: J33 Nasal polyp || id:ukb-a-541	CTACK	Inverse variance weighted	13	-2.59e-05	0.000328524	0.937127	-0.000669821	0.000617992	0.999974	0.99933	1.00062
Diagnoses - main ICD10: J33 Nasal polyp || id:ukb-a-541	EOTAXIN	MR Egger	14	-0.000487822	0.00122194	0.696745	-0.00288283	0.00190718	0.999512	0.997121	1.00191
Diagnoses - main ICD10: J33 Nasal polyp || id:ukb-a-541	EOTAXIN	Weighted median	14	-6.32e-05	0.000587748	0.914349	-0.0012152	0.00108877	0.999937	0.998786	1.00109
Diagnoses - main ICD10: J33 Nasal polyp || id:ukb-a-541	EOTAXIN	Inverse variance weighted	14	0.000183564	0.000510615	0.719224	-0.000817241	0.00118437	1.00018	0.999183	1.00119
Diagnoses - main ICD10: J33 Nasal polyp || id:ukb-a-541	FGF_BASIC	MR Egger	7	-0.00072149	0.0013389	0.613094	-0.00334572	0.00190274	0.999279	0.99666	1.0019
Diagnoses - main ICD10: J33 Nasal polyp || id:ukb-a-541	FGF_BASIC	Weighted median	7	-0.000258706	0.000942338	0.783672	-0.00210569	0.00158828	0.999741	0.997897	1.00159
Diagnoses - main ICD10: J33 Nasal polyp || id:ukb-a-541	FGF_BASIC	Inverse variance weighted	7	0.000327381	0.000714994	0.647039	-0.00107401	0.00172877	1.00033	0.998927	1.00173
Diagnoses - main ICD10: J33 Nasal polyp || id:ukb-a-541	G_CSF	MR Egger	9	3.69e-05	0.000707774	0.959826	-0.00135029	0.00142418	1.00004	0.998651	1.00143
Diagnoses - main ICD10: J33 Nasal polyp || id:ukb-a-541	G_CSF	Weighted median	9	-0.000174677	0.000670165	0.794364	-0.0014882	0.00113885	0.999825	0.998513	1.00114
Diagnoses - main ICD10: J33 Nasal polyp || id:ukb-a-541	G_CSF	Inverse variance weighted	9	-0.000115111	0.000503138	0.819035	-0.00110126	0.00087104	0.999885	0.998899	1.00087
Diagnoses - main ICD10: J33 Nasal polyp || id:ukb-a-541	GROA	MR Egger	10	-0.000952132	0.000603071	0.153033	-0.00213415	0.000229886	0.999048	0.997868	1.00023
Diagnoses - main ICD10: J33 Nasal polyp || id:ukb-a-541	GROA	Weighted median	10	-7.91e-05	0.000330957	0.81105	-0.000727799	0.000569554	0.999921	0.999272	1.00057
Diagnoses - main ICD10: J33 Nasal polyp || id:ukb-a-541	GROA	Inverse variance weighted	10	-0.000170991	0.000262831	0.515321	-0.00068614	0.000344157	0.999829	0.999314	1.00034
Diagnoses - main ICD10: J33 Nasal polyp || id:ukb-a-541	HGF	MR Egger	8	-0.00110286	0.00159458	0.515027	-0.00422824	0.00202252	0.998898	0.995781	1.00202
Diagnoses - main ICD10: J33 Nasal polyp || id:ukb-a-541	HGF	Weighted median	8	-0.000962124	0.000849335	0.257299	-0.00262682	0.000702572	0.999038	0.997377	1.0007
Diagnoses - main ICD10: J33 Nasal polyp || id:ukb-a-541	HGF	Inverse variance weighted	8	3.21e-05	0.000714164	0.964109	-0.00136762	0.0014319	1.00003	0.998633	1.00143
Diagnoses - main ICD10: J33 Nasal polyp || id:ukb-a-541	IFN_G	MR Egger	11	-0.00129865	0.00153203	0.418597	-0.00430143	0.00170414	0.998702	0.995708	1.00171
Diagnoses - main ICD10: J33 Nasal polyp || id:ukb-a-541	IFN_G	Weighted median	11	0.000178238	0.000786903	0.820808	-0.00136409	0.00172057	1.00018	0.998637	1.00172
Diagnoses - main ICD10: J33 Nasal polyp || id:ukb-a-541	IFN_G	Inverse variance weighted	11	0.000279779	0.000825765	0.734752	-0.00133872	0.00189828	1.00028	0.998662	1.0019
Diagnoses - main ICD10: J33 Nasal polyp || id:ukb-a-541	IL_10	MR Egger	14	0.000226108	0.00113171	0.844988	-0.00199204	0.00244426	1.00023	0.99801	1.00245
Diagnoses - main ICD10: J33 Nasal polyp || id:ukb-a-541	IL_10	Weighted median	14	0.000920558	0.000534693	0.0851319	-0.000127441	0.00196856	1.00092	0.999873	1.00197
Diagnoses - main ICD10: J33 Nasal polyp || id:ukb-a-541	IL_10	Inverse variance weighted	14	0.000986839	0.000514396	0.0550548	-2.14e-05	0.00199505	1.00099	0.999979	1.002
Diagnoses - main ICD10: J33 Nasal polyp || id:ukb-a-541	IL_12_P70	MR Egger	13	0.00040822	0.000659014	0.548241	-0.000883447	0.00169989	1.00041	0.999117	1.0017
Diagnoses - main ICD10: J33 Nasal polyp || id:ukb-a-541	IL_12_P70	Weighted median	13	0.000603592	0.000427035	0.157524	-0.000233396	0.00144058	1.0006	0.999767	1.00144
Diagnoses - main ICD10: J33 Nasal polyp || id:ukb-a-541	IL_12_P70	Inverse variance weighted	13	0.000704316	0.000368389	0.0558914	-1.77e-05	0.00142636	1.0007	0.999982	1.00143
Diagnoses - main ICD10: J33 Nasal polyp || id:ukb-a-541	IL_13	MR Egger	11	0.000757953	0.000489704	0.156082	-0.000201867	0.00171777	1.00076	0.999798	1.00172
Diagnoses - main ICD10: J33 Nasal polyp || id:ukb-a-541	IL_13	Weighted median	11	0.000520213	0.000346153	0.13288	-0.000158246	0.00119867	1.00052	0.999842	1.0012
Diagnoses - main ICD10: J33 Nasal polyp || id:ukb-a-541	IL_13	Inverse variance weighted	11	0.000319123	0.000280519	0.255281	-0.000230695	0.00086894	1.00032	0.999769	1.00087
Diagnoses - main ICD10: J33 Nasal polyp || id:ukb-a-541	IL_16	MR Egger	8	-0.000442194	0.000458417	0.371992	-0.00134069	0.000456304	0.999558	0.99866	1.00046
Diagnoses - main ICD10: J33 Nasal polyp || id:ukb-a-541	IL_16	Weighted median	8	-0.000336093	0.000345336	0.330436	-0.00101295	0.000340765	0.999664	0.998988	1.00034
Diagnoses - main ICD10: J33 Nasal polyp || id:ukb-a-541	IL_16	Inverse variance weighted	8	-0.000377449	0.000294519	0.199991	-0.000954706	0.000199808	0.999623	0.999046	1.0002
Diagnoses - main ICD10: J33 Nasal polyp || id:ukb-a-541	IL_17	MR Egger	8	-0.000478473	0.00117065	0.69693	-0.00277295	0.001816	0.999522	0.997231	1.00182
Diagnoses - main ICD10: J33 Nasal polyp || id:ukb-a-541	IL_17	Weighted median	8	0.000109661	0.000756946	0.884812	-0.00137395	0.00159327	1.00011	0.998627	1.00159
Diagnoses - main ICD10: J33 Nasal polyp || id:ukb-a-541	IL_17	Inverse variance weighted	8	-0.000317722	0.00060457	0.599212	-0.00150268	0.000867236	0.999682	0.998498	1.00087
Diagnoses - main ICD10: J33 Nasal polyp || id:ukb-a-541	IL_18	MR Egger	11	-0.000592641	0.000588961	0.340582	-0.00174701	0.000561723	0.999408	0.998255	1.00056
Diagnoses - main ICD10: J33 Nasal polyp || id:ukb-a-541	IL_18	Weighted median	11	-0.000400479	0.000397432	0.313614	-0.00117945	0.000378487	0.9996	0.998821	1.00038
Diagnoses - main ICD10: J33 Nasal polyp || id:ukb-a-541	IL_18	Inverse variance weighted	11	-0.00028293	0.000297818	0.342108	-0.000866653	0.000300794	0.999717	0.999134	1.0003
Diagnoses - main ICD10: J33 Nasal polyp || id:ukb-a-541	IL_1B	MR Egger	3	-0.000635431	0.00572415	0.929618	-0.0118548	0.0105839	0.999365	0.988215	1.01064
Diagnoses - main ICD10: J33 Nasal polyp || id:ukb-a-541	IL_1B	Weighted median	3	0.000604817	0.00118805	0.610694	-0.00172377	0.0029334	1.0006	0.998278	1.00294
Diagnoses - main ICD10: J33 Nasal polyp || id:ukb-a-541	IL_1B	Inverse variance weighted	3	0.000507337	0.00172997	0.769321	-0.0028834	0.00389807	1.00051	0.997121	1.00391
Diagnoses - main ICD10: J33 Nasal polyp || id:ukb-a-541	IL_1RA	MR Egger	7	0.00251595	0.00219229	0.303048	-0.00178093	0.00681283	1.00252	0.998221	1.00684
Diagnoses - main ICD10: J33 Nasal polyp || id:ukb-a-541	IL_1RA	Weighted median	7	9.87e-05	0.00087855	0.91056	-0.00162327	0.00182065	1.0001	0.998378	1.00182
Diagnoses - main ICD10: J33 Nasal polyp || id:ukb-a-541	IL_1RA	Inverse variance weighted	7	0.000438223	0.000797832	0.582822	-0.00112553	0.00200197	1.00044	0.998875	1.002
Diagnoses - main ICD10: J33 Nasal polyp || id:ukb-a-541	IL_2	MR Egger	8	0.00233029	0.0010627	0.0708003	0.000247404	0.00441318	1.00233	1.00025	1.00442
Diagnoses - main ICD10: J33 Nasal polyp || id:ukb-a-541	IL_2	Weighted median	8	0.00135388	0.000628908	0.0313383	0.000121223	0.00258654	1.00135	1.00012	1.00259
Diagnoses - main ICD10: J33 Nasal polyp || id:ukb-a-541	IL_2	Inverse variance weighted	8	0.00129146	0.000573521	0.0243348	0.000167355	0.00241556	1.00129	1.00017	1.00242
Diagnoses - main ICD10: J33 Nasal polyp || id:ukb-a-541	IL_2RA	MR Egger	7	0.000748942	0.00064358	0.297048	-0.000512475	0.00201036	1.00075	0.999488	1.00201
Diagnoses - main ICD10: J33 Nasal polyp || id:ukb-a-541	IL_2RA	Weighted median	7	0.000964274	0.000452432	0.0330634	7.75e-05	0.00185104	1.00096	1.00008	1.00185
Diagnoses - main ICD10: J33 Nasal polyp || id:ukb-a-541	IL_2RA	Inverse variance weighted	7	0.000520109	0.000406529	0.200759	-0.000276687	0.0013169	1.00052	0.999723	1.00132
Diagnoses - main ICD10: J33 Nasal polyp || id:ukb-a-541	IL_4	MR Egger	14	0.000564146	0.000803071	0.495778	-0.00100987	0.00213817	1.00056	0.998991	1.00214
Diagnoses - main ICD10: J33 Nasal polyp || id:ukb-a-541	IL_4	Weighted median	14	0.000234045	0.000689026	0.734101	-0.00111645	0.00158454	1.00023	0.998884	1.00159
Diagnoses - main ICD10: J33 Nasal polyp || id:ukb-a-541	IL_4	Inverse variance weighted	14	0.000790949	0.00048027	0.0995821	-0.000150381	0.00173228	1.00079	0.99985	1.00173
Diagnoses - main ICD10: J33 Nasal polyp || id:ukb-a-541	IL_5	MR Egger	8	-0.0010042	0.00117405	0.425199	-0.00330533	0.00129693	0.998996	0.9967	1.0013
Diagnoses - main ICD10: J33 Nasal polyp || id:ukb-a-541	IL_5	Weighted median	8	-0.000426561	0.000665279	0.521408	-0.00173051	0.000877385	0.999574	0.998271	1.00088
Diagnoses - main ICD10: J33 Nasal polyp || id:ukb-a-541	IL_5	Inverse variance weighted	8	0.000238901	0.000481119	0.619504	-0.000704092	0.0011819	1.00024	0.999296	1.00118
Diagnoses - main ICD10: J33 Nasal polyp || id:ukb-a-541	IL_6	MR Egger	10	-0.0012435	0.00115565	0.313296	-0.00350858	0.00102158	0.998757	0.996498	1.00102
Diagnoses - main ICD10: J33 Nasal polyp || id:ukb-a-541	IL_6	Weighted median	10	-0.000453804	0.000821682	0.580752	-0.0020643	0.00115669	0.999546	0.997938	1.00116
Diagnoses - main ICD10: J33 Nasal polyp || id:ukb-a-541	IL_6	Inverse variance weighted	10	5.84e-05	0.000602744	0.922815	-0.00112298	0.00123978	1.00006	0.998878	1.00124
Diagnoses - main ICD10: J33 Nasal polyp || id:ukb-a-541	IL_7	MR Egger	10	0.000976803	0.000699296	0.199993	-0.000393816	0.00234742	1.00098	0.999606	1.00235
Diagnoses - main ICD10: J33 Nasal polyp || id:ukb-a-541	IL_7	Weighted median	10	0.00070793	0.000429644	0.0994115	-0.000134172	0.00155003	1.00071	0.999866	1.00155
Diagnoses - main ICD10: J33 Nasal polyp || id:ukb-a-541	IL_7	Inverse variance weighted	10	0.00052055	0.000328634	0.113198	-0.000123572	0.00116467	1.00052	0.999876	1.00117
Diagnoses - main ICD10: J33 Nasal polyp || id:ukb-a-541	IL_8	MR Egger	7	7.35e-05	0.00072942	0.923684	-0.00135619	0.00150313	1.00007	0.998645	1.0015
Diagnoses - main ICD10: J33 Nasal polyp || id:ukb-a-541	IL_8	Weighted median	7	-0.000266288	0.000592637	0.653196	-0.00142786	0.000895281	0.999734	0.998573	1.0009
Diagnoses - main ICD10: J33 Nasal polyp || id:ukb-a-541	IL_8	Inverse variance weighted	7	-0.000295761	0.000439085	0.500576	-0.00115637	0.000564847	0.999704	0.998844	1.00057
Diagnoses - main ICD10: J33 Nasal polyp || id:ukb-a-541	IL_9	MR Egger	5	5.88e-05	0.00176157	0.975465	-0.00339387	0.00351148	1.00006	0.996612	1.00352
Diagnoses - main ICD10: J33 Nasal polyp || id:ukb-a-541	IL_9	Weighted median	5	0.000216342	0.000738075	0.769433	-0.00123029	0.00166297	1.00022	0.99877	1.00166
Diagnoses - main ICD10: J33 Nasal polyp || id:ukb-a-541	IL_9	Inverse variance weighted	5	0.000552964	0.000642377	0.389343	-0.000706094	0.00181202	1.00055	0.999294	1.00181
Diagnoses - main ICD10: J33 Nasal polyp || id:ukb-a-541	IP_10	MR Egger	11	0.000418876	0.000987605	0.681427	-0.00151683	0.00235458	1.00042	0.998484	1.00236
Diagnoses - main ICD10: J33 Nasal polyp || id:ukb-a-541	IP_10	Weighted median	11	-0.000822535	0.000573692	0.151641	-0.00194697	0.000301901	0.999178	0.998055	1.0003
Diagnoses - main ICD10: J33 Nasal polyp || id:ukb-a-541	IP_10	Inverse variance weighted	11	-0.000145185	0.00046789	0.756334	-0.00106225	0.000771878	0.999855	0.998938	1.00077
Diagnoses - main ICD10: J33 Nasal polyp || id:ukb-a-541	M_CSF	MR Egger	11	0.000754217	0.000667917	0.288008	-0.0005549	0.00206333	1.00075	0.999445	1.00207
Diagnoses - main ICD10: J33 Nasal polyp || id:ukb-a-541	M_CSF	Weighted median	11	-0.000301319	0.00043067	0.484145	-0.00114543	0.000542794	0.999699	0.998855	1.00054
Diagnoses - main ICD10: J33 Nasal polyp || id:ukb-a-541	M_CSF	Inverse variance weighted	11	-8.88e-05	0.000332489	0.789388	-0.000740488	0.000562869	0.999911	0.99926	1.00056
Diagnoses - main ICD10: J33 Nasal polyp || id:ukb-a-541	MCP_1_MCAF	MR Egger	13	4.86e-05	0.000995052	0.961959	-0.00190175	0.00199885	1.00005	0.9981	1.002
Diagnoses - main ICD10: J33 Nasal polyp || id:ukb-a-541	MCP_1_MCAF	Weighted median	13	0.000294179	0.000588733	0.617299	-0.000859737	0.00144809	1.00029	0.999141	1.00145
Diagnoses - main ICD10: J33 Nasal polyp || id:ukb-a-541	MCP_1_MCAF	Inverse variance weighted	13	0.000262087	0.000453938	0.563695	-0.000627632	0.00115181	1.00026	0.999373	1.00115
Diagnoses - main ICD10: J33 Nasal polyp || id:ukb-a-541	MCP_3	MR Egger	6	-0.00137782	0.000870187	0.188508	-0.00308339	0.000327743	0.998623	0.996921	1.00033
Diagnoses - main ICD10: J33 Nasal polyp || id:ukb-a-541	MCP_3	Weighted median	6	-9.2e-05	0.000435646	0.832686	-0.0009459	0.000761833	0.999908	0.999055	1.00076
Diagnoses - main ICD10: J33 Nasal polyp || id:ukb-a-541	MCP_3	Inverse variance weighted	6	-0.00013469	0.000389104	0.729228	-0.000897334	0.000627955	0.999865	0.999103	1.00063
Diagnoses - main ICD10: J33 Nasal polyp || id:ukb-a-541	MIF	MR Egger	10	0.000474915	0.000965702	0.636082	-0.00141786	0.00236769	1.00048	0.998583	1.00237
Diagnoses - main ICD10: J33 Nasal polyp || id:ukb-a-541	MIF	Weighted median	10	0.000129908	0.000614999	0.832705	-0.00107549	0.0013353	1.00013	0.998925	1.00134
Diagnoses - main ICD10: J33 Nasal polyp || id:ukb-a-541	MIF	Inverse variance weighted	10	0.000273807	0.000453592	0.546082	-0.000615233	0.00116285	1.00027	0.999385	1.00116
Diagnoses - main ICD10: J33 Nasal polyp || id:ukb-a-541	MIG	MR Egger	10	-0.00130999	0.00085429	0.163713	-0.0029844	0.00036442	0.998691	0.99702	1.00036
Diagnoses - main ICD10: J33 Nasal polyp || id:ukb-a-541	MIG	Weighted median	10	5.28e-05	0.000535382	0.921438	-0.000996547	0.00110215	1.00005	0.999004	1.0011
Diagnoses - main ICD10: J33 Nasal polyp || id:ukb-a-541	MIG	Inverse variance weighted	10	0.000272141	0.000554587	0.623632	-0.00081485	0.00135913	1.00027	0.999185	1.00136
Diagnoses - main ICD10: J33 Nasal polyp || id:ukb-a-541	MIP_1A	MR Egger	4	-0.00907942	0.00279695	0.0832221	-0.0145614	-0.00359741	0.990962	0.985544	0.996409
Diagnoses - main ICD10: J33 Nasal polyp || id:ukb-a-541	MIP_1A	Weighted median	4	-0.00104459	0.000944326	0.26865	-0.00289547	0.000806288	0.998956	0.997109	1.00081
Diagnoses - main ICD10: J33 Nasal polyp || id:ukb-a-541	MIP_1A	Inverse variance weighted	4	-0.00155606	0.00125096	0.213539	-0.00400795	0.000895821	0.998445	0.996	1.0009
Diagnoses - main ICD10: J33 Nasal polyp || id:ukb-a-541	MIP_1B	MR Egger	19	-0.000284638	0.000422689	0.509746	-0.00111311	0.000543833	0.999715	0.998888	1.00054
Diagnoses - main ICD10: J33 Nasal polyp || id:ukb-a-541	MIP_1B	Weighted median	19	-0.000200092	0.000365077	0.583636	-0.000915642	0.000515458	0.9998	0.999085	1.00052
Diagnoses - main ICD10: J33 Nasal polyp || id:ukb-a-541	MIP_1B	Inverse variance weighted	19	-3.51e-05	0.000257482	0.891482	-0.000539794	0.000469538	0.999965	0.99946	1.00047
Diagnoses - main ICD10: J33 Nasal polyp || id:ukb-a-541	PDGF_BB	MR Egger	13	-0.000385197	0.000764343	0.624231	-0.00188331	0.00111291	0.999615	0.998118	1.00111
Diagnoses - main ICD10: J33 Nasal polyp || id:ukb-a-541	PDGF_BB	Weighted median	13	-0.000915707	0.000545067	0.0929591	-0.00198404	0.000152624	0.999085	0.998018	1.00015
Diagnoses - main ICD10: J33 Nasal polyp || id:ukb-a-541	PDGF_BB	Inverse variance weighted	13	-0.000798155	0.000402939	0.0476097	-0.00158791	-8.4e-06	0.999202	0.998413	0.999992
Diagnoses - main ICD10: J33 Nasal polyp || id:ukb-a-541	RANTES	MR Egger	10	0.000633125	0.00113464	0.592114	-0.00159077	0.00285702	1.00063	0.99841	1.00286
Diagnoses - main ICD10: J33 Nasal polyp || id:ukb-a-541	RANTES	Weighted median	10	-0.000194065	0.000601871	0.747122	-0.00137373	0.000985601	0.999806	0.998627	1.00099
Diagnoses - main ICD10: J33 Nasal polyp || id:ukb-a-541	RANTES	Inverse variance weighted	10	-0.000216991	0.000452225	0.631349	-0.00110335	0.000669371	0.999783	0.998897	1.00067
Diagnoses - main ICD10: J33 Nasal polyp || id:ukb-a-541	SCF	MR Egger	11	-0.000889169	0.00128974	0.507944	-0.00341706	0.00163872	0.999111	0.996589	1.00164
Diagnoses - main ICD10: J33 Nasal polyp || id:ukb-a-541	SCF	Weighted median	11	6.31e-06	0.000723876	0.993043	-0.00141248	0.00142511	1.00001	0.998589	1.00143
Diagnoses - main ICD10: J33 Nasal polyp || id:ukb-a-541	SCF	Inverse variance weighted	11	7.29e-07	0.000561166	0.998964	-0.00109916	0.00110061	1	0.998901	1.0011
Diagnoses - main ICD10: J33 Nasal polyp || id:ukb-a-541	SCGF_B	MR Egger	18	-0.000921546	0.000546214	0.110969	-0.00199213	0.000149033	0.999079	0.99801	1.00015
Diagnoses - main ICD10: J33 Nasal polyp || id:ukb-a-541	SCGF_B	Weighted median	18	-0.00014195	0.000410632	0.729577	-0.000946789	0.000662888	0.999858	0.999054	1.00066
Diagnoses - main ICD10: J33 Nasal polyp || id:ukb-a-541	SCGF_B	Inverse variance weighted	18	-0.000319517	0.000293362	0.276085	-0.000894507	0.000255472	0.999681	0.999106	1.00026
Diagnoses - main ICD10: J33 Nasal polyp || id:ukb-a-541	SDF_1A	MR Egger	7	0.000618825	0.000957515	0.546585	-0.0012579	0.00249555	1.00062	0.998743	1.0025
Diagnoses - main ICD10: J33 Nasal polyp || id:ukb-a-541	SDF_1A	Weighted median	7	5.46e-05	0.000770186	0.943485	-0.00145496	0.00156416	1.00005	0.998546	1.00157
Diagnoses - main ICD10: J33 Nasal polyp || id:ukb-a-541	SDF_1A	Inverse variance weighted	7	-7.02e-06	0.000623406	0.99102	-0.00122889	0.00121486	0.999993	0.998772	1.00122
Diagnoses - main ICD10: J33 Nasal polyp || id:ukb-a-541	TNF_A	MR Egger	5	0.00044368	0.000835797	0.632312	-0.00119448	0.00208184	1.00044	0.998806	1.00208
Diagnoses - main ICD10: J33 Nasal polyp || id:ukb-a-541	TNF_A	Weighted median	5	0.0005145	0.000636168	0.41866	-0.000732389	0.00176139	1.00051	0.999268	1.00176
Diagnoses - main ICD10: J33 Nasal polyp || id:ukb-a-541	TNF_A	Inverse variance weighted	5	0.000178173	0.000506098	0.724798	-0.000813779	0.00117012	1.00018	0.999187	1.00117
Diagnoses - main ICD10: J33 Nasal polyp || id:ukb-a-541	TNF_B	MR Egger	5	1.73e-05	0.000654451	0.980614	-0.00126546	0.00129998	1.00002	0.998735	1.0013
Diagnoses - main ICD10: J33 Nasal polyp || id:ukb-a-541	TNF_B	Weighted median	5	6.91e-06	0.000326399	0.98311	-0.000632832	0.000646652	1.00001	0.999367	1.00065
Diagnoses - main ICD10: J33 Nasal polyp || id:ukb-a-541	TNF_B	Inverse variance weighted	5	0.000141394	0.000384839	0.713313	-0.000612891	0.000895679	1.00014	0.999387	1.0009
Diagnoses - main ICD10: J33 Nasal polyp || id:ukb-a-541	TRAIL	MR Egger	16	-0.000421622	0.000340212	0.235611	-0.00108844	0.000245193	0.999578	0.998912	1.00025
Diagnoses - main ICD10: J33 Nasal polyp || id:ukb-a-541	TRAIL	Weighted median	16	-0.000240081	0.000338041	0.477572	-0.000902641	0.00042248	0.99976	0.999098	1.00042
Diagnoses - main ICD10: J33 Nasal polyp || id:ukb-a-541	TRAIL	Inverse variance weighted	16	-0.000314735	0.000266806	0.238144	-0.000837674	0.000208205	0.999685	0.999163	1.00021
Diagnoses - main ICD10: J33 Nasal polyp || id:ukb-a-541	VEGF	MR Egger	15	0.000163647	0.000604861	0.790982	-0.00102188	0.00134917	1.00016	0.998979	1.00135
Diagnoses - main ICD10: J33 Nasal polyp || id:ukb-a-541	VEGF	Weighted median	15	0.000275244	0.000320549	0.390525	-0.000353032	0.000903521	1.00028	0.999647	1.0009
Diagnoses - main ICD10: J33 Nasal polyp || id:ukb-a-541	VEGF	Inverse variance weighted	15	-2.22e-05	0.000369125	0.952071	-0.000745672	0.000701299	0.999978	0.999255	1.0007

## Sheet: S3
MR analysis of Inflammatory Cytokines on CRS
outcome	exposure	method	nsnp	b	se	pval	lo_ci	up_ci	or	or_lci95	or_uci95
Diagnoses - main ICD10: J32 Chronic sinusitis || id:ukb-d-J32	B_NGF	MR Egger	4	0.0043231	0.00329846	0.320262	-0.00214189	0.0107881	1.00433	0.99786	1.01085
Diagnoses - main ICD10: J32 Chronic sinusitis || id:ukb-d-J32	B_NGF	Weighted median	4	-0.000363504	0.000716222	0.611783	-0.0017673	0.00104029	0.999637	0.998234	1.00104
Diagnoses - main ICD10: J32 Chronic sinusitis || id:ukb-d-J32	B_NGF	Inverse variance weighted	4	-0.000375908	0.000649759	0.562903	-0.00164944	0.000897619	0.999624	0.998352	1.0009
Diagnoses - main ICD10: J32 Chronic sinusitis || id:ukb-d-J32	CTACK	MR Egger	13	-0.000416282	0.000457642	0.38252	-0.00131326	0.000480696	0.999584	0.998688	1.00048
Diagnoses - main ICD10: J32 Chronic sinusitis || id:ukb-d-J32	CTACK	Weighted median	13	0.000372849	0.000385315	0.333221	-0.000382369	0.00112807	1.00037	0.999618	1.00113
Diagnoses - main ICD10: J32 Chronic sinusitis || id:ukb-d-J32	CTACK	Inverse variance weighted	13	0.000253674	0.000283864	0.371511	-0.000302699	0.000810046	1.00025	0.999697	1.00081
Diagnoses - main ICD10: J32 Chronic sinusitis || id:ukb-d-J32	EOTAXIN	MR Egger	15	0.000492518	0.000809555	0.553416	-0.00109421	0.00207924	1.00049	0.998906	1.00208
Diagnoses - main ICD10: J32 Chronic sinusitis || id:ukb-d-J32	EOTAXIN	Weighted median	15	0.000204411	0.000492199	0.677922	-0.000760299	0.00116912	1.0002	0.99924	1.00117
Diagnoses - main ICD10: J32 Chronic sinusitis || id:ukb-d-J32	EOTAXIN	Inverse variance weighted	15	5.42e-05	0.000340823	0.873562	-0.000613776	0.000722251	1.00005	0.999386	1.00072
Diagnoses - main ICD10: J32 Chronic sinusitis || id:ukb-d-J32	FGF_BASIC	MR Egger	6	-0.00100651	0.00109006	0.408081	-0.00314303	0.00113001	0.998994	0.996862	1.00113
Diagnoses - main ICD10: J32 Chronic sinusitis || id:ukb-d-J32	FGF_BASIC	Weighted median	6	-0.000900362	0.000743869	0.226134	-0.00235835	0.000557621	0.9991	0.997644	1.00056
Diagnoses - main ICD10: J32 Chronic sinusitis || id:ukb-d-J32	FGF_BASIC	Inverse variance weighted	6	-0.000386021	0.000585814	0.509929	-0.00153422	0.000762174	0.999614	0.998467	1.00076
Diagnoses - main ICD10: J32 Chronic sinusitis || id:ukb-d-J32	G_CSF	MR Egger	9	8.95e-05	0.000705138	0.90253	-0.00129254	0.00147161	1.00009	0.998708	1.00147
Diagnoses - main ICD10: J32 Chronic sinusitis || id:ukb-d-J32	G_CSF	Weighted median	9	0.000163711	0.000537955	0.760883	-0.000890681	0.0012181	1.00016	0.99911	1.00122
Diagnoses - main ICD10: J32 Chronic sinusitis || id:ukb-d-J32	G_CSF	Inverse variance weighted	9	8.97e-06	0.000469604	0.984758	-0.000911452	0.000929396	1.00001	0.999089	1.00093
Diagnoses - main ICD10: J32 Chronic sinusitis || id:ukb-d-J32	GROA	MR Egger	10	-0.00022133	0.00048847	0.662507	-0.00117873	0.000736071	0.999779	0.998822	1.00074
Diagnoses - main ICD10: J32 Chronic sinusitis || id:ukb-d-J32	GROA	Weighted median	10	0.0004318	0.00027018	0.11	-9.78e-05	0.000961352	1.00043	0.999902	1.00096
Diagnoses - main ICD10: J32 Chronic sinusitis || id:ukb-d-J32	GROA	Inverse variance weighted	10	0.000281496	0.000214014	0.188403	-0.00013797	0.000700963	1.00028	0.999862	1.0007
Diagnoses - main ICD10: J32 Chronic sinusitis || id:ukb-d-J32	HGF	MR Egger	9	0.0010676	0.00109187	0.360761	-0.00107247	0.00320768	1.00107	0.998928	1.00321
Diagnoses - main ICD10: J32 Chronic sinusitis || id:ukb-d-J32	HGF	Weighted median	9	-6.08e-05	0.000643859	0.924776	-0.00132276	0.00120117	0.999939	0.998678	1.0012
Diagnoses - main ICD10: J32 Chronic sinusitis || id:ukb-d-J32	HGF	Inverse variance weighted	9	0.000156353	0.00049645	0.752807	-0.00081669	0.0011294	1.00016	0.999184	1.00113
Diagnoses - main ICD10: J32 Chronic sinusitis || id:ukb-d-J32	IFN_G	MR Egger	11	2.58e-06	0.00126855	0.998424	-0.00248378	0.00248893	1	0.997519	1.00249
Diagnoses - main ICD10: J32 Chronic sinusitis || id:ukb-d-J32	IFN_G	Weighted median	11	-0.000388548	0.000659462	0.555734	-0.00168109	0.000903997	0.999612	0.99832	1.0009
Diagnoses - main ICD10: J32 Chronic sinusitis || id:ukb-d-J32	IFN_G	Inverse variance weighted	11	-0.000370309	0.000638248	0.561782	-0.00162127	0.000880657	0.99963	0.99838	1.00088
Diagnoses - main ICD10: J32 Chronic sinusitis || id:ukb-d-J32	IL_10	MR Egger	14	0.000358309	0.000736871	0.635544	-0.00108596	0.00180258	1.00036	0.998915	1.0018
Diagnoses - main ICD10: J32 Chronic sinusitis || id:ukb-d-J32	IL_10	Weighted median	14	0.000365306	0.000420088	0.384523	-0.000458067	0.00118868	1.00037	0.999542	1.00119
Diagnoses - main ICD10: J32 Chronic sinusitis || id:ukb-d-J32	IL_10	Inverse variance weighted	14	0.000240142	0.000340583	0.480753	-0.0004274	0.000907685	1.00024	0.999573	1.00091
Diagnoses - main ICD10: J32 Chronic sinusitis || id:ukb-d-J32	IL_12_P70	MR Egger	13	0.000255826	0.000508848	0.625049	-0.000741516	0.00125317	1.00026	0.999259	1.00125
Diagnoses - main ICD10: J32 Chronic sinusitis || id:ukb-d-J32	IL_12_P70	Weighted median	13	0.000281219	0.000355517	0.428935	-0.000415593	0.000978032	1.00028	0.999584	1.00098
Diagnoses - main ICD10: J32 Chronic sinusitis || id:ukb-d-J32	IL_12_P70	Inverse variance weighted	13	0.00020595	0.000293075	0.48223	-0.000368477	0.000780377	1.00021	0.999632	1.00078
Diagnoses - main ICD10: J32 Chronic sinusitis || id:ukb-d-J32	IL_13	MR Egger	11	-7.48e-05	0.000528555	0.890639	-0.00111072	0.000961209	0.999925	0.99889	1.00096
Diagnoses - main ICD10: J32 Chronic sinusitis || id:ukb-d-J32	IL_13	Weighted median	11	8.5e-05	0.000305179	0.780674	-0.000513177	0.000683126	1.00008	0.999487	1.00068
Diagnoses - main ICD10: J32 Chronic sinusitis || id:ukb-d-J32	IL_13	Inverse variance weighted	11	5.77e-05	0.000289124	0.841764	-0.000508964	0.000624404	1.00006	0.999491	1.00062
Diagnoses - main ICD10: J32 Chronic sinusitis || id:ukb-d-J32	IL_16	MR Egger	9	0.00026804	0.000368365	0.490445	-0.000453955	0.000990036	1.00027	0.999546	1.00099
Diagnoses - main ICD10: J32 Chronic sinusitis || id:ukb-d-J32	IL_16	Weighted median	9	0.000248018	0.000289916	0.392284	-0.000320217	0.000816252	1.00025	0.99968	1.00082
Diagnoses - main ICD10: J32 Chronic sinusitis || id:ukb-d-J32	IL_16	Inverse variance weighted	9	8.86e-05	0.000233753	0.704747	-0.000369582	0.00054673	1.00009	0.99963	1.00055
Diagnoses - main ICD10: J32 Chronic sinusitis || id:ukb-d-J32	IL_17	MR Egger	8	-0.000882265	0.000953873	0.390686	-0.00275186	0.000987326	0.999118	0.997252	1.00099
Diagnoses - main ICD10: J32 Chronic sinusitis || id:ukb-d-J32	IL_17	Weighted median	8	-0.000740131	0.000635918	0.244473	-0.00198653	0.000506268	0.99926	0.998015	1.00051
Diagnoses - main ICD10: J32 Chronic sinusitis || id:ukb-d-J32	IL_17	Inverse variance weighted	8	-0.000149582	0.000491957	0.761086	-0.00111382	0.000814654	0.99985	0.998887	1.00081
Diagnoses - main ICD10: J32 Chronic sinusitis || id:ukb-d-J32	IL_18	MR Egger	12	6.98e-05	0.000478568	0.886907	-0.000868176	0.00100781	1.00007	0.999132	1.00101
Diagnoses - main ICD10: J32 Chronic sinusitis || id:ukb-d-J32	IL_18	Weighted median	12	0.000152723	0.000320772	0.633994	-0.000475989	0.000781436	1.00015	0.999524	1.00078
Diagnoses - main ICD10: J32 Chronic sinusitis || id:ukb-d-J32	IL_18	Inverse variance weighted	12	-6.58e-05	0.000237633	0.781913	-0.000531543	0.000399977	0.999934	0.999469	1.0004
Diagnoses - main ICD10: J32 Chronic sinusitis || id:ukb-d-J32	IL_1B	MR Egger	3	-4.19e-05	0.00226141	0.988207	-0.00447426	0.00439046	0.999958	0.995536	1.0044
Diagnoses - main ICD10: J32 Chronic sinusitis || id:ukb-d-J32	IL_1B	Weighted median	3	0.00053599	0.00081717	0.511882	-0.00106566	0.00213764	1.00054	0.998935	1.00214
Diagnoses - main ICD10: J32 Chronic sinusitis || id:ukb-d-J32	IL_1B	Inverse variance weighted	3	0.000466073	0.000687599	0.497881	-0.000881621	0.00181377	1.00047	0.999119	1.00182
Diagnoses - main ICD10: J32 Chronic sinusitis || id:ukb-d-J32	IL_1RA	MR Egger	8	0.00210545	0.00136841	0.174821	-0.000576637	0.00478753	1.00211	0.999424	1.0048
Diagnoses - main ICD10: J32 Chronic sinusitis || id:ukb-d-J32	IL_1RA	Weighted median	8	-0.000406806	0.000606786	0.502585	-0.00159611	0.000782494	0.999593	0.998405	1.00078
Diagnoses - main ICD10: J32 Chronic sinusitis || id:ukb-d-J32	IL_1RA	Inverse variance weighted	8	-0.000232347	0.000459846	0.613368	-0.00113364	0.000668951	0.999768	0.998867	1.00067
Diagnoses - main ICD10: J32 Chronic sinusitis || id:ukb-d-J32	IL_2	MR Egger	8	0.00151646	0.000685006	0.0687829	0.000173851	0.00285907	1.00152	1.00017	1.00286
Diagnoses - main ICD10: J32 Chronic sinusitis || id:ukb-d-J32	IL_2	Weighted median	8	0.000705282	0.000504037	0.161733	-0.000282631	0.00169319	1.00071	0.999717	1.00169
Diagnoses - main ICD10: J32 Chronic sinusitis || id:ukb-d-J32	IL_2	Inverse variance weighted	8	0.000235869	0.000438023	0.590242	-0.000622657	0.00109439	1.00024	0.999378	1.00109
Diagnoses - main ICD10: J32 Chronic sinusitis || id:ukb-d-J32	IL_2RA	MR Egger	8	0.001079	0.000428429	0.0453783	0.000239282	0.00191873	1.00108	1.00024	1.00192
Diagnoses - main ICD10: J32 Chronic sinusitis || id:ukb-d-J32	IL_2RA	Weighted median	8	0.000637103	0.000338006	0.0594448	-2.54e-05	0.00129959	1.00064	0.999975	1.0013
Diagnoses - main ICD10: J32 Chronic sinusitis || id:ukb-d-J32	IL_2RA	Inverse variance weighted	8	0.000446483	0.000282497	0.113995	-0.00010721	0.00100018	1.00045	0.999893	1.001
Diagnoses - main ICD10: J32 Chronic sinusitis || id:ukb-d-J32	IL_4	MR Egger	14	0.000660043	0.000860121	0.457687	-0.00102579	0.00234588	1.00066	0.998975	1.00235
Diagnoses - main ICD10: J32 Chronic sinusitis || id:ukb-d-J32	IL_4	Weighted median	14	0.000498714	0.000586851	0.395428	-0.000651513	0.00164894	1.0005	0.999349	1.00165
Diagnoses - main ICD10: J32 Chronic sinusitis || id:ukb-d-J32	IL_4	Inverse variance weighted	14	0.000459576	0.000496162	0.35431	-0.000512902	0.00143206	1.00046	0.999487	1.00143
Diagnoses - main ICD10: J32 Chronic sinusitis || id:ukb-d-J32	IL_5	MR Egger	7	0.000101102	0.00105749	0.927547	-0.00197158	0.00217378	1.0001	0.99803	1.00218
Diagnoses - main ICD10: J32 Chronic sinusitis || id:ukb-d-J32	IL_5	Weighted median	7	0.000187274	0.000494823	0.705084	-0.00078258	0.00115713	1.00019	0.999218	1.00116
Diagnoses - main ICD10: J32 Chronic sinusitis || id:ukb-d-J32	IL_5	Inverse variance weighted	7	0.000178915	0.000405386	0.658964	-0.000615642	0.000973472	1.00018	0.999385	1.00097
Diagnoses - main ICD10: J32 Chronic sinusitis || id:ukb-d-J32	IL_6	MR Egger	10	-0.000158588	0.00096358	0.873355	-0.0020472	0.00173003	0.999841	0.997955	1.00173
Diagnoses - main ICD10: J32 Chronic sinusitis || id:ukb-d-J32	IL_6	Weighted median	10	-0.000749976	0.000676223	0.267402	-0.00207537	0.000575422	0.99925	0.997927	1.00058
Diagnoses - main ICD10: J32 Chronic sinusitis || id:ukb-d-J32	IL_6	Inverse variance weighted	10	-0.000369268	0.000490118	0.451193	-0.0013299	0.000591362	0.999631	0.998671	1.00059
Diagnoses - main ICD10: J32 Chronic sinusitis || id:ukb-d-J32	IL_7	MR Egger	12	0.000813784	0.000525881	0.152789	-0.000216942	0.00184451	1.00081	0.999783	1.00185
Diagnoses - main ICD10: J32 Chronic sinusitis || id:ukb-d-J32	IL_7	Weighted median	12	0.000273687	0.000347561	0.431019	-0.000407533	0.000954906	1.00027	0.999593	1.00096
Diagnoses - main ICD10: J32 Chronic sinusitis || id:ukb-d-J32	IL_7	Inverse variance weighted	12	0.000182081	0.000254023	0.473505	-0.000315804	0.000679965	1.00018	0.999684	1.00068
Diagnoses - main ICD10: J32 Chronic sinusitis || id:ukb-d-J32	IL_8	MR Egger	8	-0.000770188	0.000504616	0.17779	-0.00175924	0.00021886	0.99923	0.998242	1.00022
Diagnoses - main ICD10: J32 Chronic sinusitis || id:ukb-d-J32	IL_8	Weighted median	8	-0.000383821	0.000438643	0.381564	-0.00124356	0.000475919	0.999616	0.998757	1.00048
Diagnoses - main ICD10: J32 Chronic sinusitis || id:ukb-d-J32	IL_8	Inverse variance weighted	8	-0.000115564	0.000323088	0.720578	-0.000748816	0.000517688	0.999884	0.999251	1.00052
Diagnoses - main ICD10: J32 Chronic sinusitis || id:ukb-d-J32	IL_9	MR Egger	6	0.00302523	0.00103521	0.043143	0.000996214	0.00505425	1.00303	1.001	1.00507
Diagnoses - main ICD10: J32 Chronic sinusitis || id:ukb-d-J32	IL_9	Weighted median	6	0.000224656	0.000598083	0.707194	-0.000947586	0.0013969	1.00022	0.999053	1.0014
Diagnoses - main ICD10: J32 Chronic sinusitis || id:ukb-d-J32	IL_9	Inverse variance weighted	6	4.47e-05	0.000647622	0.94499	-0.00122465	0.00131402	1.00004	0.998776	1.00131
Diagnoses - main ICD10: J32 Chronic sinusitis || id:ukb-d-J32	IP_10	MR Egger	10	0.00146056	0.00087187	0.132424	-0.000248307	0.00316942	1.00146	0.999752	1.00317
Diagnoses - main ICD10: J32 Chronic sinusitis || id:ukb-d-J32	IP_10	Weighted median	10	0.000255929	0.000515191	0.619355	-0.000753846	0.0012657	1.00026	0.999246	1.00127
Diagnoses - main ICD10: J32 Chronic sinusitis || id:ukb-d-J32	IP_10	Inverse variance weighted	10	0.000134474	0.000460161	0.770109	-0.000767441	0.00103639	1.00013	0.999233	1.00104
Diagnoses - main ICD10: J32 Chronic sinusitis || id:ukb-d-J32	M_CSF	MR Egger	11	0.00023345	0.000511771	0.659083	-0.000769622	0.00123652	1.00023	0.999231	1.00124
Diagnoses - main ICD10: J32 Chronic sinusitis || id:ukb-d-J32	M_CSF	Weighted median	11	-0.000201123	0.000329234	0.541278	-0.000846423	0.000444176	0.999799	0.999154	1.00044
Diagnoses - main ICD10: J32 Chronic sinusitis || id:ukb-d-J32	M_CSF	Inverse variance weighted	11	-0.00019043	0.000242234	0.431785	-0.000665209	0.000284349	0.99981	0.999335	1.00028
Diagnoses - main ICD10: J32 Chronic sinusitis || id:ukb-d-J32	MCP_1_MCAF	MR Egger	12	0.000638161	0.000794992	0.440794	-0.000920023	0.00219635	1.00064	0.99908	1.0022
Diagnoses - main ICD10: J32 Chronic sinusitis || id:ukb-d-J32	MCP_1_MCAF	Weighted median	12	0.00111041	0.000489656	0.0233451	0.000150686	0.00207014	1.00111	1.00015	1.00207
Diagnoses - main ICD10: J32 Chronic sinusitis || id:ukb-d-J32	MCP_1_MCAF	Inverse variance weighted	12	0.000546571	0.000362213	0.131304	-0.000163366	0.00125651	1.00055	0.999837	1.00126
Diagnoses - main ICD10: J32 Chronic sinusitis || id:ukb-d-J32	MCP_3	MR Egger	6	-0.00056405	0.000699058	0.464982	-0.0019342	0.000806104	0.999436	0.998068	1.00081
Diagnoses - main ICD10: J32 Chronic sinusitis || id:ukb-d-J32	MCP_3	Weighted median	6	6.69e-07	0.000341871	0.998438	-0.000669398	0.000670736	1	0.999331	1.00067
Diagnoses - main ICD10: J32 Chronic sinusitis || id:ukb-d-J32	MCP_3	Inverse variance weighted	6	-2.39e-05	0.000275985	0.930904	-0.000564862	0.000517001	0.999976	0.999435	1.00052
Diagnoses - main ICD10: J32 Chronic sinusitis || id:ukb-d-J32	MIF	MR Egger	9	-0.00018962	0.00090865	0.840638	-0.00197057	0.00159133	0.99981	0.998031	1.00159
Diagnoses - main ICD10: J32 Chronic sinusitis || id:ukb-d-J32	MIF	Weighted median	9	0.000413163	0.000506354	0.414524	-0.00057929	0.00140562	1.00041	0.999421	1.00141
Diagnoses - main ICD10: J32 Chronic sinusitis || id:ukb-d-J32	MIF	Inverse variance weighted	9	0.000213959	0.000385375	0.578761	-0.000541377	0.000969295	1.00021	0.999459	1.00097
Diagnoses - main ICD10: J32 Chronic sinusitis || id:ukb-d-J32	MIG	MR Egger	13	-0.000235841	0.000562617	0.68315	-0.00133857	0.000866889	0.999764	0.998662	1.00087
Diagnoses - main ICD10: J32 Chronic sinusitis || id:ukb-d-J32	MIG	Weighted median	13	0.00032335	0.000366422	0.377533	-0.000394838	0.00104154	1.00032	0.999605	1.00104
Diagnoses - main ICD10: J32 Chronic sinusitis || id:ukb-d-J32	MIG	Inverse variance weighted	13	0.000431693	0.000274839	0.11625	-0.000106992	0.000970377	1.00043	0.999893	1.00097
Diagnoses - main ICD10: J32 Chronic sinusitis || id:ukb-d-J32	MIP_1A	MR Egger	6	0.000175099	0.00235959	0.944408	-0.00444969	0.00479989	1.00018	0.99556	1.00481
Diagnoses - main ICD10: J32 Chronic sinusitis || id:ukb-d-J32	MIP_1A	Weighted median	6	-0.000642357	0.000690693	0.352361	-0.00199612	0.0007114	0.999358	0.998006	1.00071
Diagnoses - main ICD10: J32 Chronic sinusitis || id:ukb-d-J32	MIP_1A	Inverse variance weighted	6	-0.000400715	0.000720888	0.578305	-0.00181365	0.00101223	0.999599	0.998188	1.00101
Diagnoses - main ICD10: J32 Chronic sinusitis || id:ukb-d-J32	MIP_1B	MR Egger	20	-0.000217328	0.000377727	0.572172	-0.000957674	0.000523017	0.999783	0.999043	1.00052
Diagnoses - main ICD10: J32 Chronic sinusitis || id:ukb-d-J32	MIP_1B	Weighted median	20	-0.000380788	0.000288947	0.187556	-0.000947124	0.000185549	0.999619	0.999053	1.00019
Diagnoses - main ICD10: J32 Chronic sinusitis || id:ukb-d-J32	MIP_1B	Inverse variance weighted	20	-0.000122851	0.000226189	0.587037	-0.000566181	0.000320479	0.999877	0.999434	1.00032
Diagnoses - main ICD10: J32 Chronic sinusitis || id:ukb-d-J32	PDGF_BB	MR Egger	14	0.000482972	0.000813733	0.563849	-0.00111194	0.00207789	1.00048	0.998889	1.00208
Diagnoses - main ICD10: J32 Chronic sinusitis || id:ukb-d-J32	PDGF_BB	Weighted median	14	0.000246736	0.000425244	0.561765	-0.000586743	0.00108022	1.00025	0.999413	1.00108
Diagnoses - main ICD10: J32 Chronic sinusitis || id:ukb-d-J32	PDGF_BB	Inverse variance weighted	14	-7.47e-05	0.000413382	0.856631	-0.000884912	0.000735545	0.999925	0.999115	1.00074
Diagnoses - main ICD10: J32 Chronic sinusitis || id:ukb-d-J32	RANTES	MR Egger	10	-0.000311609	0.00110274	0.784674	-0.00247298	0.00184976	0.999688	0.99753	1.00185
Diagnoses - main ICD10: J32 Chronic sinusitis || id:ukb-d-J32	RANTES	Weighted median	10	-6.87e-05	0.000531396	0.897065	-0.00111028	0.000972789	0.999931	0.99889	1.00097
Diagnoses - main ICD10: J32 Chronic sinusitis || id:ukb-d-J32	RANTES	Inverse variance weighted	10	3.35e-05	0.000417659	0.936003	-0.000785076	0.000852148	1.00003	0.999215	1.00085
Diagnoses - main ICD10: J32 Chronic sinusitis || id:ukb-d-J32	SCF	MR Egger	10	0.00158063	0.00130969	0.261952	-0.000986355	0.00414761	1.00158	0.999014	1.00416
Diagnoses - main ICD10: J32 Chronic sinusitis || id:ukb-d-J32	SCF	Weighted median	10	0.000484524	0.000623599	0.437171	-0.000737731	0.00170678	1.00048	0.999263	1.00171
Diagnoses - main ICD10: J32 Chronic sinusitis || id:ukb-d-J32	SCF	Inverse variance weighted	10	0.000258918	0.000476946	0.587223	-0.000675897	0.00119373	1.00026	0.999324	1.00119
Diagnoses - main ICD10: J32 Chronic sinusitis || id:ukb-d-J32	SCGF_B	MR Egger	18	-0.000285931	0.000493206	0.570164	-0.00125261	0.000680752	0.999714	0.998748	1.00068
Diagnoses - main ICD10: J32 Chronic sinusitis || id:ukb-d-J32	SCGF_B	Weighted median	18	-9.88e-05	0.000333645	0.767204	-0.000752714	0.000555173	0.999901	0.999248	1.00056
Diagnoses - main ICD10: J32 Chronic sinusitis || id:ukb-d-J32	SCGF_B	Inverse variance weighted	18	-1.44e-05	0.000260545	0.955919	-0.00052507	0.000496266	0.999986	0.999475	1.0005
Diagnoses - main ICD10: J32 Chronic sinusitis || id:ukb-d-J32	SDF_1A	MR Egger	8	-0.000308411	0.000923479	0.749769	-0.00211843	0.00150161	0.999692	0.997884	1.0015
Diagnoses - main ICD10: J32 Chronic sinusitis || id:ukb-d-J32	SDF_1A	Weighted median	8	-0.000390885	0.000680346	0.565604	-0.00172436	0.000942594	0.999609	0.998277	1.00094
Diagnoses - main ICD10: J32 Chronic sinusitis || id:ukb-d-J32	SDF_1A	Inverse variance weighted	8	-0.000316727	0.000500582	0.526918	-0.00129787	0.000664413	0.999683	0.998703	1.00066
Diagnoses - main ICD10: J32 Chronic sinusitis || id:ukb-d-J32	TNF_A	MR Egger	4	0.000556333	0.000988374	0.6302	-0.00138088	0.00249355	1.00056	0.99862	1.0025
Diagnoses - main ICD10: J32 Chronic sinusitis || id:ukb-d-J32	TNF_A	Weighted median	4	0.000318904	0.000581208	0.583217	-0.000820264	0.00145807	1.00032	0.99918	1.00146
Diagnoses - main ICD10: J32 Chronic sinusitis || id:ukb-d-J32	TNF_A	Inverse variance weighted	4	0.000605059	0.000493563	0.220236	-0.000362324	0.00157244	1.00061	0.999638	1.00157
Diagnoses - main ICD10: J32 Chronic sinusitis || id:ukb-d-J32	TNF_B	MR Egger	5	1.34e-05	0.000442682	0.977826	-0.0008543	0.000881012	1.00001	0.999146	1.00088
Diagnoses - main ICD10: J32 Chronic sinusitis || id:ukb-d-J32	TNF_B	Weighted median	5	-0.00023235	0.000280927	0.408189	-0.000782967	0.000318267	0.999768	0.999217	1.00032
Diagnoses - main ICD10: J32 Chronic sinusitis || id:ukb-d-J32	TNF_B	Inverse variance weighted	5	-0.000277491	0.000289395	0.337627	-0.000844705	0.000289724	0.999723	0.999156	1.00029
Diagnoses - main ICD10: J32 Chronic sinusitis || id:ukb-d-J32	TRAIL	MR Egger	14	-0.000323337	0.00028858	0.284449	-0.000888954	0.00024228	0.999677	0.999111	1.00024
Diagnoses - main ICD10: J32 Chronic sinusitis || id:ukb-d-J32	TRAIL	Weighted median	14	-0.00033581	0.000295407	0.255635	-0.000914807	0.000243188	0.999664	0.999086	1.00024
Diagnoses - main ICD10: J32 Chronic sinusitis || id:ukb-d-J32	TRAIL	Inverse variance weighted	14	-0.000239112	0.000220577	0.278353	-0.000671443	0.00019322	0.999761	0.999329	1.00019
Diagnoses - main ICD10: J32 Chronic sinusitis || id:ukb-d-J32	VEGF	MR Egger	15	0.000131991	0.000340273	0.704369	-0.000534944	0.000798926	1.00013	0.999465	1.0008
Diagnoses - main ICD10: J32 Chronic sinusitis || id:ukb-d-J32	VEGF	Weighted median	15	0.000104173	0.000263803	0.692924	-0.000412881	0.000621228	1.0001	0.999587	1.00062
Diagnoses - main ICD10: J32 Chronic sinusitis || id:ukb-d-J32	VEGF	Inverse variance weighted	15	8.47e-05	0.000214272	0.692712	-0.000335298	0.000504649	1.00008	0.999665	1.0005

## Sheet: S4
SNPs Used in the Positive Results of the MR analysis of Inflammatory Cytokines on AR
exposure	outcome	SNP	effect_allele.exposure	other_allele.exposure	effect_allele.outcome	other_allele.outcome	beta.exposure	beta.outcome	eaf.exposure	eaf.outcome	remove	palindromic	ambiguous	chr	pos	se.outcome	samplesize.outcome	pval.outcome	mr_keep.outcome	se.exposure	pval.exposure	mr_keep.exposure	pval_origin.exposure	action	mr_keep	FSTAT
MIP_1A	AR	rs12690897	A	G	A	G	0.1215	0.00267313	0.292	0.262572	FALSE	FALSE	FALSE	7	85346177	0.00201919	112583	0.19	TRUE	0.026	3.073e-06	TRUE	reported	2	TRUE	21.8324
MIP_1A	AR	rs57786342	A	G	A	G	0.139	0.00302348	0.2336	0.202677	FALSE	FALSE	FALSE	14	69260028	0.00219703	112583	0.17	TRUE	0.0283	8.909e-07	TRUE	reported	2	TRUE	24.1186
MIP_1A	AR	rs60198979	A	G	A	G	-0.2154	-0.000714695	0.0788	0.085311	FALSE	FALSE	FALSE	22	43646704	0.00323696	112583	0.83	TRUE	0.0455	2.215e-06	TRUE	reported	2	TRUE	22.406
MIP_1A	AR	rs6900267	A	C	A	C	-0.2472	-0.00668153	0.9308	0.944154	FALSE	FALSE	FALSE	6	380341	0.00410893	112583	0.1	TRUE	0.0515	1.604e-06	TRUE	reported	2	TRUE	23.0344
TNF_A	AR	rs10834997	A	G	A	G	-0.123	0.000877244	0.6924	0.690635	FALSE	FALSE	FALSE	11	26526948	0.00190291	112583	0.64	TRUE	0.0256	1.528e-06	TRUE	reported	2	TRUE	23.0795
TNF_A	AR	rs111332265	A	G	A	G	-0.3678	-0.00680119	0.9696	0.941736	FALSE	FALSE	FALSE	5	150393107	0.00381911	112583	0.0749998	TRUE	0.0745	7.913e-07	TRUE	reported	2	TRUE	24.3672
TNF_A	AR	rs7256693	T	C	T	C	-0.1841	-0.00514478	0.8925	0.860053	FALSE	FALSE	FALSE	19	55064515	0.00256654	112583	0.0449997	TRUE	0.04	4.109e-06	TRUE	reported	2	TRUE	21.1779
TNF_A	AR	rs79105320	A	G	A	G	0.5573	0.00712083	0.0112	0.017779	FALSE	FALSE	FALSE	8	18817360	0.00679441	112583	0.29	TRUE	0.1177	2.207e-06	TRUE	reported	2	TRUE	22.4141

## Sheet: S5
SNPs Used in the Positive Results of the MR analysis of Inflammatory Cytokines on NP
exposure	outcome	SNP	effect_allele.exposure	other_allele.exposure	effect_allele.outcome	other_allele.outcome	beta.exposure	beta.outcome	eaf.exposure	eaf.outcome	remove	palindromic	ambiguous	chr	pos	se.outcome	samplesize.outcome	pval.outcome	mr_keep.outcome	se.exposure	pval.exposure	mr_keep.exposure	pval_origin.exposure	action	mr_keep	FSTAT
IL_2	NP	rs13412535	A	G	A	G	0.174	-0.000310767	0.1886	0.232615	FALSE	FALSE	FALSE	2	224874874	0.000200702	337199	0.121527	TRUE	0.0331	1.447e-07	TRUE	reported	2	TRUE	27.6273
IL_2	NP	rs16836080	A	G	A	G	0.1158	4.68659e-05	0.3355	0.284673	FALSE	FALSE	FALSE	3	124548684	0.000188316	337199	0.803463	TRUE	0.0253	4.841e-06	TRUE	reported	2	TRUE	20.9446
IL_2	NP	rs170117	T	C	T	C	-0.1637	-0.000115998	0.1377	0.129081	FALSE	FALSE	FALSE	4	55390380	0.000253045	337199	0.64666	TRUE	0.0347	2.442e-06	TRUE	reported	2	TRUE	22.2502
IL_2	NP	rs2690020	A	G	A	G	0.1158	0.000139114	0.5177	0.572056	FALSE	FALSE	FALSE	1	15199644	0.000174009	337199	0.42402	TRUE	0.0245	2.273e-06	TRUE	reported	2	TRUE	22.3347
IL_2	NP	rs4634519	A	G	A	G	-0.1249	-0.000163108	0.7379	0.715801	FALSE	FALSE	FALSE	7	67192928	0.000187556	337199	0.384492	TRUE	0.0268	3.18e-06	TRUE	reported	2	TRUE	21.7145
IL_2	NP	rs61335305	A	C	A	C	0.4439	0.00154209	0.0184	0.0178663	FALSE	FALSE	FALSE	15	66453074	0.0006384	337199	0.0157119	TRUE	0.0913	1.157e-06	TRUE	reported	2	TRUE	23.6333
IL_2	NP	rs62124990	T	G	T	G	-0.7013	-0.00151457	0.0083	0.0257993	FALSE	FALSE	FALSE	2	19238636	0.000541499	337199	0.00515834	TRUE	0.149	2.502e-06	TRUE	reported	2	TRUE	22.1478
IL_2	NP	rs7615304	A	G	A	G	-0.1139	-0.000260297	0.4531	0.359328	FALSE	FALSE	FALSE	3	156675703	0.0001764	337199	0.14005	TRUE	0.024	2.161e-06	TRUE	reported	2	TRUE	22.5175
PDGF_BB	NP	rs11247305	C	G	C	G	-0.1687	0.000141721	0.9376	0.964319	FALSE	TRUE	FALSE	15	102100210	0.000461995	337199	0.759028	TRUE	0.0364	3.468e-06	TRUE	reported	2	TRUE	21.4745
PDGF_BB	NP	rs116445074	T	G	T	G	0.2869	-0.000704643	0.0184	0.0147035	FALSE	FALSE	FALSE	5	51534600	0.000705664	337199	0.318012	TRUE	0.0587	1.017e-06	TRUE	reported	2	TRUE	23.8825
PDGF_BB	NP	rs11766649	A	G	A	G	0.0902	-0.000139197	0.8018	0.740701	FALSE	FALSE	FALSE	7	144839247	0.000193083	337199	0.470959	TRUE	0.0196	3.964e-06	TRUE	reported	2	TRUE	21.1737
PDGF_BB	NP	rs12289510	A	G	A	G	-0.0772	-4.30046e-05	0.4767	0.483584	FALSE	FALSE	FALSE	11	124947051	0.000169799	337199	0.800062	TRUE	0.0158	1.001e-06	TRUE	reported	2	TRUE	23.868
PDGF_BB	NP	rs13037046	A	T	A	T	-0.0948	0.000102692	0.1871	0.237261	FALSE	TRUE	FALSE	20	4054634	0.000201251	337199	0.609864	TRUE	0.0206	3.958e-06	TRUE	reported	2	TRUE	21.1728
PDGF_BB	NP	rs13412535	A	G	A	G	0.3317	-0.000310767	0.1892	0.232615	FALSE	FALSE	FALSE	2	224874874	0.000200702	337199	0.121527	TRUE	0.0214	2.893e-54	TRUE	reported	2	TRUE	240.192
PDGF_BB	NP	rs2324229	T	C	T	C	0.0884	-0.000381349	0.6134	0.626038	FALSE	FALSE	FALSE	6	83918131	0.000175419	337199	0.0297112	TRUE	0.0161	4.016e-08	TRUE	reported	2	TRUE	30.1403
PDGF_BB	NP	rs35859699	A	G	A	G	-0.3854	0.00030226	0.0109	0.0229657	FALSE	FALSE	FALSE	4	112184751	0.00056513	337199	0.592753	TRUE	0.0838	4.223e-06	TRUE	reported	2	TRUE	21.1461
PDGF_BB	NP	rs4965869	T	C	T	C	0.1843	0.000229918	0.2446	0.270704	FALSE	FALSE	FALSE	15	101990320	0.000191236	337199	0.22926	TRUE	0.0181	2.22e-24	TRUE	reported	2	TRUE	103.655
PDGF_BB	NP	rs72777070	T	G	T	G	-0.1048	0.00031054	0.7854	0.800503	FALSE	FALSE	FALSE	2	9798877	0.000219242	337199	0.156652	TRUE	0.02	1.557e-07	TRUE	reported	2	TRUE	27.451
PDGF_BB	NP	rs73162807	A	C	A	C	-0.2313	0.000219942	0.0259	0.0225712	FALSE	FALSE	FALSE	3	146474790	0.000583706	337199	0.706321	TRUE	0.0499	3.548e-06	TRUE	reported	2	TRUE	21.4806
PDGF_BB	NP	rs9936075	A	G	A	G	-0.0767	0.000129121	0.6436	0.663362	FALSE	FALSE	FALSE	16	7321909	0.000179135	337199	0.47103	TRUE	0.0163	2.675e-06	TRUE	reported	2	TRUE	22.1366
PDGF_BB	NP	rs9941733	A	G	A	G	0.1165	2.61673e-05	0.8364	0.829424	FALSE	FALSE	FALSE	20	374061	0.00022604	337199	0.90784	TRUE	0.0227	3.018e-07	TRUE	reported	2	TRUE	26.3327
